# Supplementary material for: Increased incidence of endophthalmitis after vitrectomy relative to face mask wearing during COVID-19 pandemic
Source: HighWire-hosted journal article supplement (doi:10.1136/bjophthalmol-2022-321357), 2022-06-21
Supplement: bjophthalmol-2022-321357supp001_data_supplement.pdf [file bjophthalmol-2022-321357supp001_data_supplement.pdf]

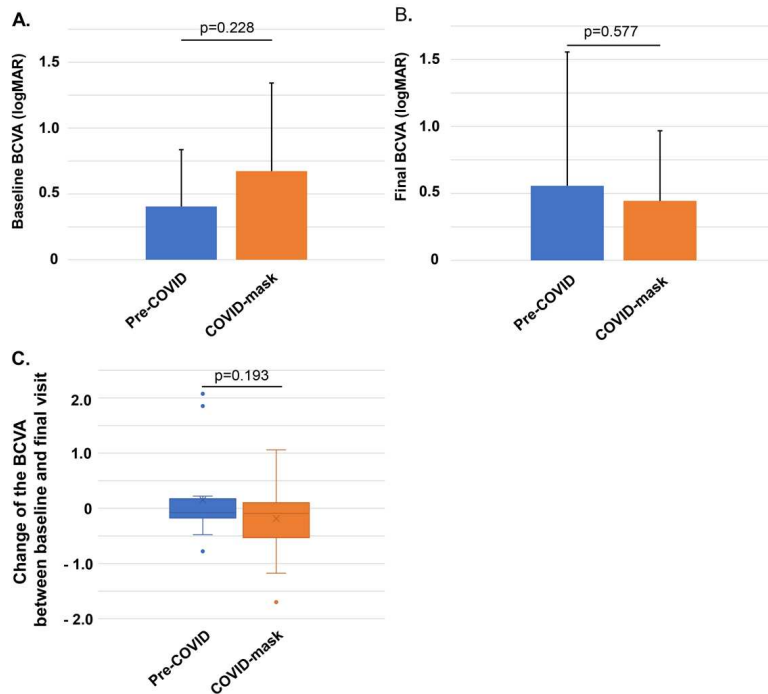

**online supplemental figure S1: Baseline and final best-corrected visual acuity (BCVA) in pre-COVID and COVID-mask period.**

Baseline and final BCVA of post-vitreotomy endophthalmitis in pre-COVID and COVID-mask periods were compared. Baseline BCVA (A), final BCVA (B), and the change of the BCVA between final and baseline BCVA (C) were not significantly different in the pre-COVID and during COVID-mask period.
