# Supplementary material for: Increased incidence of endophthalmitis after vitrectomy relative to face mask wearing during COVID-19 pandemic
Source: HighWire-hosted journal article supplement (doi:10.1136/bjophthalmol-2022-321357), 2022-06-21
Supplement: bjophthalmol-2022-321357supp002_data_supplement.pdf [file bjophthalmol-2022-321357supp002_data_supplement.pdf]

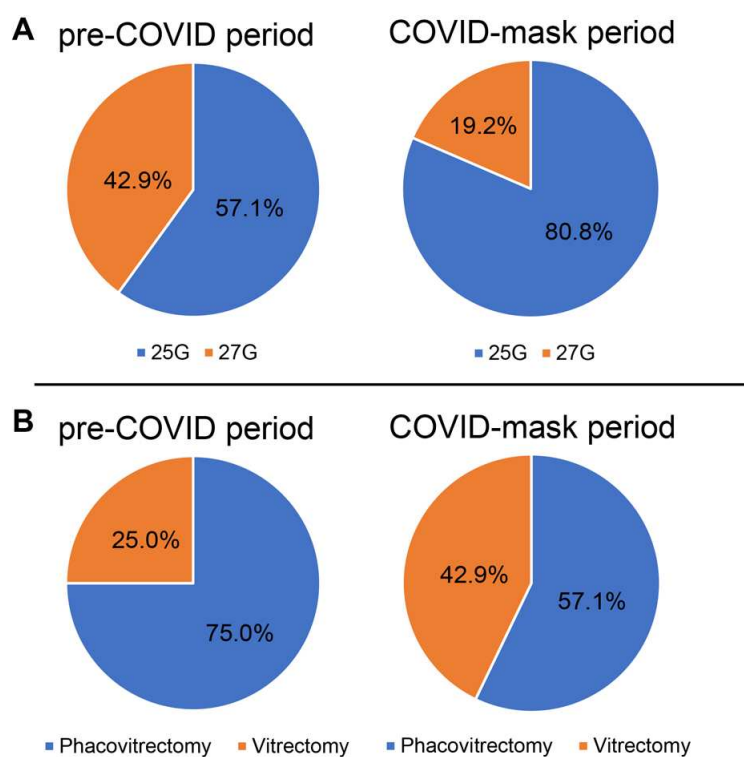

**online supplemental figure S2: Breakdown of vitrectomy in the pre-COVID and COVID-mask periods: the size of vitrectomy probes and the vitrectomy alone/phacovitrectomy.**

There was a tendency for more endophthalmitis cases in the COVID-mask period that had undergone 25G vitrectomy (A) and more vitrectomy procedures alone (B), but it did not reach statistical significance.
